# Supplementary material for: Whole-Exome Sequencing Reveals High Mutational Concordance between Primary and Matched Recurrent Triple-Negative Breast Cancers
Source: MDPI journal article supplement (doi:10.3390/genes14091690), 2023-08-25
Supplement: s1 [file s1]

**Supplementary Table S1:** DNA amount and DNA integrity number for primary tumors that recurred (P; n=11); recurrent tumors (R; n=9) and primary tumors that did not recur (P'; n=15)

| <b>Sample</b> | <b>Amount (μg)</b> | <b>DNA Integrity Number</b> |
|---------------|--------------------|-----------------------------|
| P1            | 0.31               | 5.4                         |
| R1            | 1.10               | 5.6                         |
| P2            | 0.18               | 4.7                         |
| R2            | 0.55               | 4.5                         |
| P3            | 0.09               | 3.2                         |
| R3            | 0.14               | 4.2                         |
| P4            | 0.88               | 4.4                         |
| R4            | 0.06               | 4.9                         |
| P5            | 0.11               | 4.7                         |
| R5            | 0.13               | 4.5                         |
| P6            | 0.50               | 4.4                         |
| R6            | 0.18               | 4.4                         |
| P7            | 0.22               | 4.4                         |
| R7            | 0.49               | 4.9                         |
| P8            | 0.06               | 3.4                         |
| R8            | 0.13               | 4.9                         |
| P9            | 0.19               | 4.1                         |
| R9            | 0.02               | 2.7                         |
| P10           | 0.06               | 3.5                         |
| P11           | 0.12               | 4.1                         |
| P1'           | 0.24               | 3.5                         |
| P2'           | 1.15               | 5.4                         |
| P3'           | 0.48               | 4.0                         |
| P4'           | 3.24               | 4.8                         |
| P5'           | 0.25               | 5.0                         |
| P6'           | 1.40               | 4.4                         |
| P7'           | 0.22               | 3.5                         |
| P8'           | 0.41               | 4.4                         |
| P9'           | 0.88               | 4.1                         |
| P10'          | 0.31               | 4.0                         |
| P11'          | 1.58               | 4.8                         |
| P12'          | 0.18               | 4.2                         |
| P13'          | 0.48               | 4.0                         |
| P14'          | 0.10               | 3.5                         |
| P15'          | 1.35               | 4.6                         |

**Supplementary Table S2.** Summary of SNVs and indels in paired primary (P; n=9) and recurrent (R; n=9) tumors

|           |       |      | Frameshift<br>deletion | Frameshift<br>insertion | In-<br>frame<br>deletion | In-frame<br>insertion | Missense | Nonsense | Non-<br>stop | Splice-<br>site | Translation<br>start site |
|-----------|-------|------|------------------------|-------------------------|--------------------------|-----------------------|----------|----------|--------------|-----------------|---------------------------|
| <b>P1</b> | SNV   | 312  |                        |                         |                          |                       | 254      | 25       | 2            | 27              | 4                         |
|           | Indel | 221  | 81                     | 23                      | 64                       | 53                    |          |          |              |                 |                           |
| <b>R1</b> | SNV   | 336  |                        |                         |                          |                       | 242      | 40       | 0            | 51              | 3                         |
|           | Indel | 259  | 102                    | 31                      | 65                       | 61                    |          |          |              |                 |                           |
| <b>P2</b> | SNV   | 319  |                        |                         |                          |                       | 242      | 48       | 2            | 24              | 3                         |
|           | Indel | 257  | 101                    | 28                      | 61                       | 67                    |          |          |              |                 |                           |
| <b>R2</b> | SNV   | 705  |                        |                         |                          |                       | 459      | 117      | 8            | 113             | 8                         |
|           | Indel | 645  | 371                    | 69                      | 135                      | 70                    |          |          |              |                 |                           |
| <b>P3</b> | SNV   | 431  |                        |                         |                          |                       | 296      | 57       | 4            | 72              | 2                         |
|           | Indel | 301  | 145                    | 31                      | 68                       | 57                    |          |          |              |                 |                           |
| <b>R3</b> | SNV   | 456  |                        |                         |                          |                       | 309      | 73       | 5            | 65              | 4                         |
|           | Indel | 325  | 165                    | 45                      | 62                       | 53                    |          |          |              |                 |                           |
| <b>P4</b> | SNV   | 405  |                        |                         |                          |                       | 288      | 51       | 7            | 56              | 3                         |
|           | Indel | 319  | 144                    | 39                      | 74                       | 62                    |          |          |              |                 |                           |
| <b>R4</b> | SNV   | 301  |                        |                         |                          |                       | 218      | 44       | 3            | 33              | 3                         |
|           | Indel | 228  | 69                     | 26                      | 73                       | 60                    |          |          |              |                 |                           |
| <b>P5</b> | SNV   | 303  |                        |                         |                          |                       | 226      | 34       | 1            | 37              | 5                         |
|           | Indel | 219  | 83                     | 24                      | 57                       | 55                    |          |          |              |                 |                           |
| <b>R5</b> | SNV   | 334  |                        |                         |                          |                       | 247      | 42       | 3            | 36              | 6                         |
|           | Indel | 237  | 88                     | 27                      | 63                       | 59                    |          |          |              |                 |                           |
| <b>P6</b> | SNV   | 458  |                        |                         |                          |                       | 331      | 59       | 3            | 61              | 4                         |
|           | Indel | 306  | 149                    | 28                      | 63                       | 66                    |          |          |              |                 |                           |
| <b>R6</b> | SNV   | 573  |                        |                         |                          |                       | 390      | 90       | 6            | 65              | 7                         |
|           | Indel | 415  | 200                    | 49                      | 93                       | 73                    |          |          |              |                 |                           |
| <b>P7</b> | SNV   | 431  |                        |                         |                          |                       | 305      | 58       | 1            | 63              | 4                         |
|           | Indel | 362  | 169                    | 46                      | 71                       | 76                    |          |          |              |                 |                           |
| <b>R7</b> | SNV   | 509  |                        |                         |                          |                       | 362      | 66       | 9            | 65              | 7                         |
|           | Indel | 360  | 156                    | 39                      | 94                       | 71                    |          |          |              |                 |                           |
| <b>P8</b> | SNV   | 514  |                        |                         |                          |                       | 342      | 80       | 4            | 86              | 2                         |
|           | Indel | 445  | 255                    | 39                      | 85                       | 66                    |          |          |              |                 |                           |
| <b>R8</b> | SNV   | 380  |                        |                         |                          |                       | 263      | 65       | 1            | 48              | 3                         |
|           | Indel | 278  | 97                     | 35                      | 81                       | 65                    |          |          |              |                 |                           |
| <b>P9</b> | SNV   | 535  |                        |                         |                          |                       | 389      | 82       | 5            | 57              | 2                         |
|           | Indel | 354  | 173                    | 40                      | 85                       | 56                    |          |          |              |                 |                           |
| <b>R9</b> | SNV   | 2179 |                        |                         |                          |                       | 1552     | 358      | 12           | 249             | 8                         |
|           | Indel | 2089 | 1430                   | 343                     | 220                      | 96                    |          |          |              |                 |                           |

**Supplementary Table S3.** Summary of SNVs and indels in primary tumors that recurred (P; n=11) and primary tumors that remained recurrence-free (P'; n=15)

|             |       |      | Frameshift deletions | Frameshift insertion | In-frame deletion | In-frame insertion | Misense | Nonsense | Non-stop | Splice-site | Translation start site |
|-------------|-------|------|----------------------|----------------------|-------------------|--------------------|---------|----------|----------|-------------|------------------------|
| <b>P1</b>   | SNV   | 312  |                      |                      |                   |                    | 254     | 25       | 2        | 27          | 4                      |
|             | Indel | 221  | 81                   | 23                   | 64                | 53                 |         |          |          |             |                        |
| <b>P2</b>   | SNV   | 319  |                      |                      |                   |                    | 242     | 48       | 2        | 24          | 3                      |
|             | Indel | 257  | 101                  | 28                   | 61                | 67                 |         |          |          |             |                        |
| <b>P3</b>   | SNV   | 431  |                      |                      |                   |                    | 296     | 57       | 4        | 72          | 2                      |
|             | Indel | 301  | 145                  | 31                   | 68                | 57                 |         |          |          |             |                        |
| <b>P4</b>   | SNV   | 405  |                      |                      |                   |                    | 288     | 51       | 7        | 56          | 3                      |
|             | Indel | 319  | 144                  | 39                   | 74                | 62                 |         |          |          |             |                        |
| <b>P5</b>   | SNV   | 303  |                      |                      |                   |                    | 226     | 34       | 1        | 37          | 5                      |
|             | Indel | 219  | 83                   | 24                   | 57                | 55                 |         |          |          |             |                        |
| <b>P6</b>   | SNV   | 458  |                      |                      |                   |                    | 331     | 59       | 3        | 61          | 4                      |
|             | Indel | 306  | 149                  | 28                   | 63                | 66                 |         |          |          |             |                        |
| <b>P7</b>   | SNV   | 431  |                      |                      |                   |                    | 305     | 58       | 1        | 63          | 4                      |
|             | Indel | 362  | 169                  | 46                   | 71                | 76                 |         |          |          |             |                        |
| <b>P8</b>   | SNV   | 514  |                      |                      |                   |                    | 342     | 80       | 4        | 86          | 2                      |
|             | Indel | 445  | 255                  | 39                   | 85                | 66                 |         |          |          |             |                        |
| <b>P9</b>   | SNV   | 535  |                      |                      |                   |                    | 389     | 82       | 5        | 57          | 2                      |
|             | Indel | 354  | 173                  | 40                   | 85                | 56                 |         |          |          |             |                        |
| <b>P10</b>  | SNV   | 2647 |                      |                      |                   |                    | 2106    | 314      | 10       | 203         | 14                     |
|             | Indel | 1171 | 774                  | 72                   | 294               | 31                 |         |          |          |             |                        |
| <b>P11</b>  | SNV   | 1138 |                      |                      |                   |                    | 864     | 156      | 7        | 105         | 6                      |
|             | Indel | 579  | 365                  | 56                   | 119               | 39                 |         |          |          |             |                        |
| <b>P1'</b>  | SNV   | 396  |                      |                      |                   |                    | 286     | 52       | 7        | 46          | 5                      |
|             | Indel | 272  | 98                   | 37                   | 84                | 53                 |         |          |          |             |                        |
| <b>P2'</b>  | SNV   | 279  |                      |                      |                   |                    | 219     | 23       | 1        | 34          | 2                      |
|             | Indel | 208  | 72                   | 18                   | 53                | 65                 |         |          |          |             |                        |
| <b>P3'</b>  | SNV   | 435  |                      |                      |                   |                    | 343     | 61       | 4        | 82          | 5                      |
|             | Indel | 389  | 197                  | 36                   | 93                | 63                 |         |          |          |             |                        |
| <b>P4'</b>  | SNV   | 321  |                      |                      |                   |                    | 229     | 42       | 1        | 45          | 4                      |
|             | Indel | 240  | 97                   | 22                   | 59                | 62                 |         |          |          |             |                        |
| <b>P5'</b>  | SNV   | 382  |                      |                      |                   |                    | 282     | 53       | 4        | 39          | 4                      |
|             | Indel | 266  | 111                  | 35                   | 62                | 58                 |         |          |          |             |                        |
| <b>P6'</b>  | SNV   | 593  |                      |                      |                   |                    | 443     | 78       | 6        | 63          | 3                      |
|             | Indel | 346  | 184                  | 39                   | 75                | 48                 |         |          |          |             |                        |
| <b>P7'</b>  | SNV   | 398  |                      |                      |                   |                    | 278     | 52       | 5        | 59          | 4                      |
|             | Indel | 297  | 111                  | 36                   | 81                | 69                 |         |          |          |             |                        |
| <b>P8'</b>  | SNV   | 416  |                      |                      |                   |                    | 284     | 54       | 4        | 69          | 5                      |
|             | Indel | 280  | 107                  | 33                   | 80                | 60                 |         |          |          |             |                        |
| <b>P9'</b>  | SNV   | 535  |                      |                      |                   |                    | 372     | 74       | 8        | 77          | 4                      |
|             | Indel | 354  | 180                  | 30                   | 86                | 58                 |         |          |          |             |                        |
| <b>P10'</b> | SNV   | 364  |                      |                      |                   |                    | 246     | 60       | 2        | 54          | 2                      |

|      |       |     |     |    |    |    |     |    |   |    |   |
|------|-------|-----|-----|----|----|----|-----|----|---|----|---|
|      | Indel | 289 | 115 | 33 | 77 | 64 |     |    |   |    |   |
| P11' | SNV   | 440 |     |    |    |    | 317 | 60 | 2 | 55 | 6 |
|      | Indel | 317 | 144 | 34 | 79 | 60 |     |    |   |    |   |
| P12' | SNV   | 352 |     |    |    |    | 278 | 36 | 6 | 31 | 1 |
|      | Indel | 263 | 99  | 29 | 69 | 66 |     |    |   |    |   |
| P13' | SNV   | 390 |     |    |    |    | 288 | 47 | 4 | 47 | 4 |
|      | Indel | 317 | 121 | 41 | 88 | 67 |     |    |   |    |   |
| P14' | SNV   | 820 |     |    |    |    | 634 | 93 | 1 | 84 | 8 |
|      | Indel | 369 | 210 | 33 | 84 | 42 |     |    |   |    |   |
| P15' | SNV   | 535 |     |    |    |    | 413 | 63 | 1 | 56 | 2 |
|      | Indel | 294 | 123 | 30 | 78 | 63 |     |    |   |    |   |

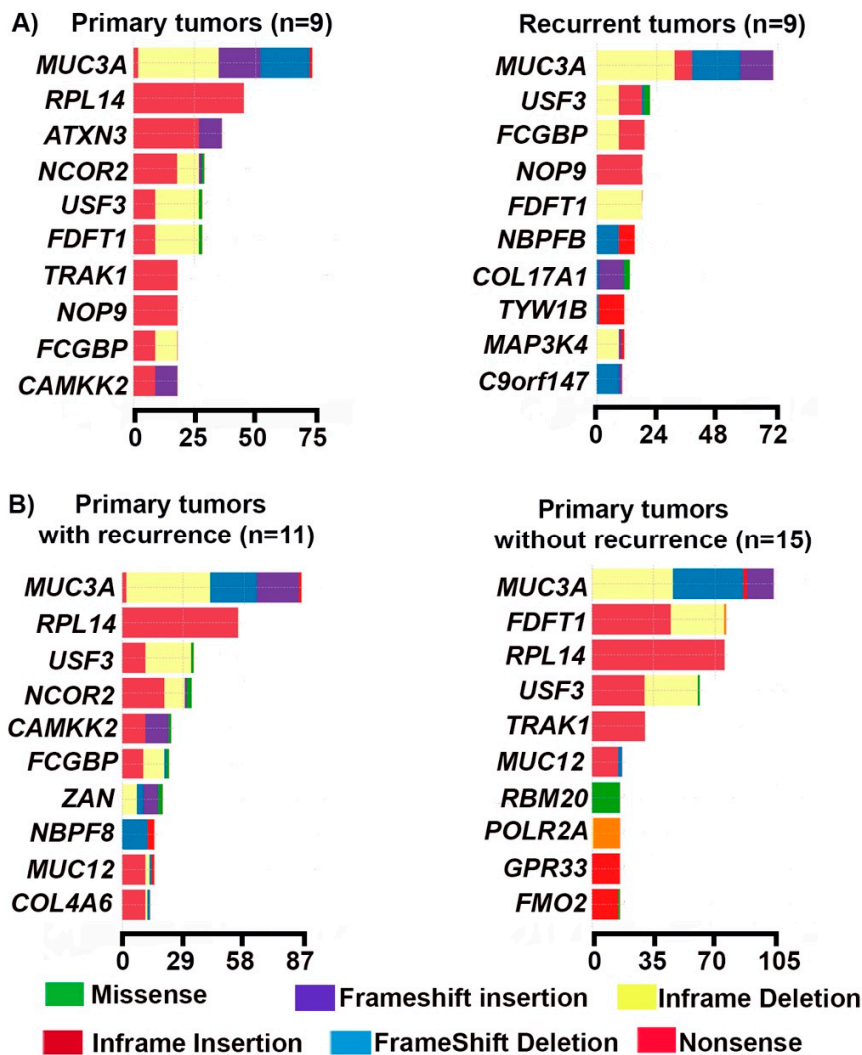

**Supplementary Figure S1.** MAF plot showing the top 10 most commonly mutated genes in primary (A) and matched recurrent tumors (n=9) and (B) in primary tumors with (n=11) and without recurrence (n=15).
